# Supplementary material for: Defibrillation time intervals and outcomes of cardiac arrest in hospital: retrospective cohort study from Get With The Guidelines-Resuscitation registry
Source: PubMed Central journal article supplement — BMJ. 2016 Apr 6;353:i1653. doi: 10.1136/bmj.i1653 (PMC4823520; doi:10.1136/bmj.i1653), 2016-04-06
Supplement: bras029442.ww1_default.pdf [file bras029442.ww1_default.pdf]

**Appendix: Supplementary material [posted as supplied by author]**

**Figure A.** Standardized differences for patients with known versus unknown defibrillation time intervals

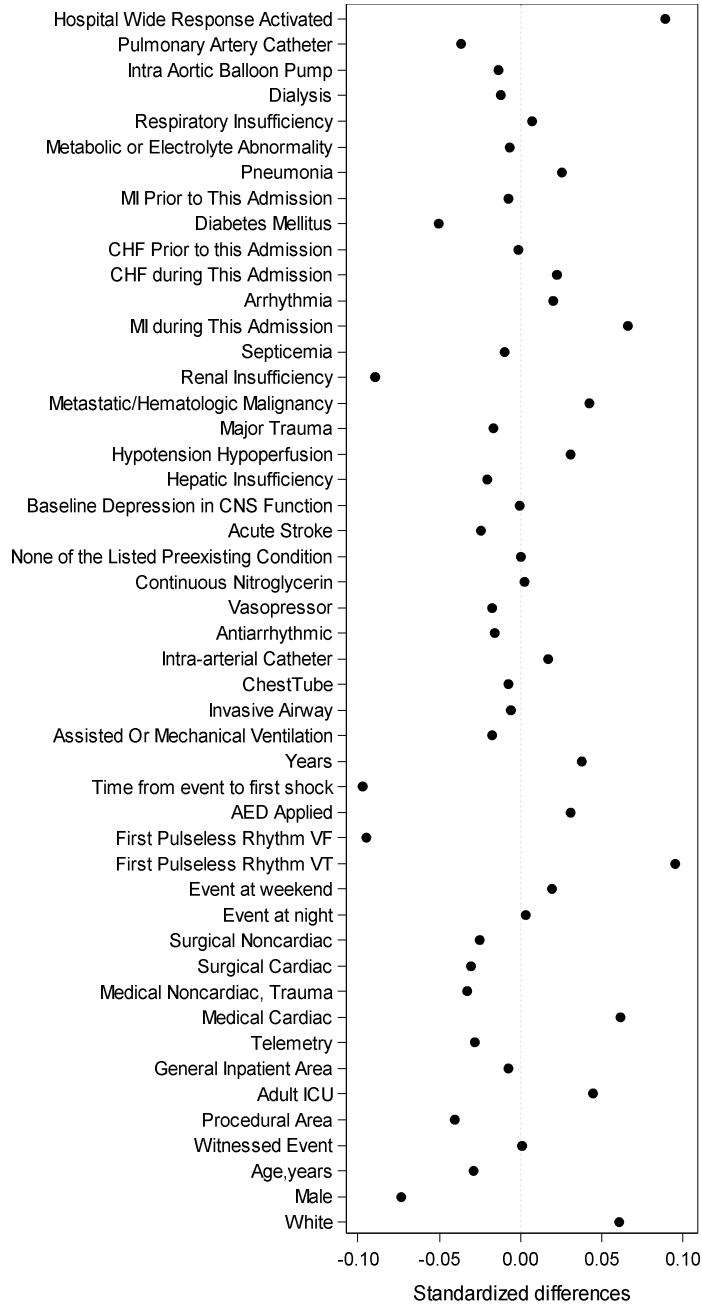

All absolute standardized differences were under 10%. The maximum difference was in time from CPA event to first shock (9.69%). The next largest differences were in initial cardiac arrest rhythm (9.5%). Most of the absolute differences were under 5%.

## **Propensity Modeling Analysis**

We estimated the propensity to have a longer time interval between the first two defibrillation attempts using a binary logistic regression model. We used a non-parsimonious model that included 39 patient level covariates and a random effect for hospitals. The covariates included were: patient demographics (sex, race, age); patient pre-existing conditions (heart failure this admission, previous heart failure, myocardial infarction this admission, previous myocardial infarction, arrhythmia, hypotension, respiratory insufficiency, hepatic insufficiency, metabolic or electrolyte abnormality, diabetes mellitus, baseline depression in CNS function, acute stroke, pneumonia, septicemia, major trauma, metastatic cancer, renal insufficiency, none of the above); intervention already in place during defibrillation (assisted or mechanical ventilation, invasive airway device, chest tube, monitoring with an arterial line, vasodilator drugs, intravenous vasopressor medication, dialysis, intra-aortic balloon pump, pulmonary artery catheter); and characteristics of the arrest (illness category, initial cardiac arrest rhythm, event locations, witnessed, event time (day, night, weekend), hospital-wide response activated, assessed with AED), time from event to first shock, and calendar year. Due to variation across hospitals in the proportion of patients receiving defibrillation after longer time intervals, we compared 3 different propensity models for balancing covariates – a marginal model, fixed effect model, and random effect model.<sup>20</sup> The fixed effect model resulted in the best balance of all covariates and was selected for our analysis.

From the propensity score model, we calculated the stabilized inverse probability weight. Balance in the patient covariates was evaluated using standardized differences of the covariates between the long and short defibrillation interval groups (Figure B). After weighting, the standardized differences were much smaller. The maximum standardized difference after weighting was 7%, with the majority under 2.5%, much smaller than the commonly accepted adequate balance of 10% for absolute standardized difference.<sup>21</sup> The outcome model included the main effect for the defibrillation time interval, weighted by the stabilized inverse probability weight. The sandwich estimator of the variance was used in estimating the standard error of the

estimated main effect, to account for clustering of patients within hospitals and for modified Poisson estimation of relative risk.

We conducted a survival analysis of time from in-hospital cardiac arrest to death, censored at discharge or 30 days (whichever came first). In this analysis, 120 patients were missing values for the time of the censoring event (death or discharge) and were excluded from the analysis. The adjusted Kaplan-Meier curves weighted on the inverse probability of treatment weights (IPTW) of the propensity score are shown below (Figure C; log-rank  $P=0.17$ ). Using a Cox model with IPTW, we observed a hazard ratio of 1.07 (95% Confidence Interval 0.98, 1.17;  $P=0.17$ ).

**Figure B.** Standardized differences of patient-level covariates before and after propensity weighting

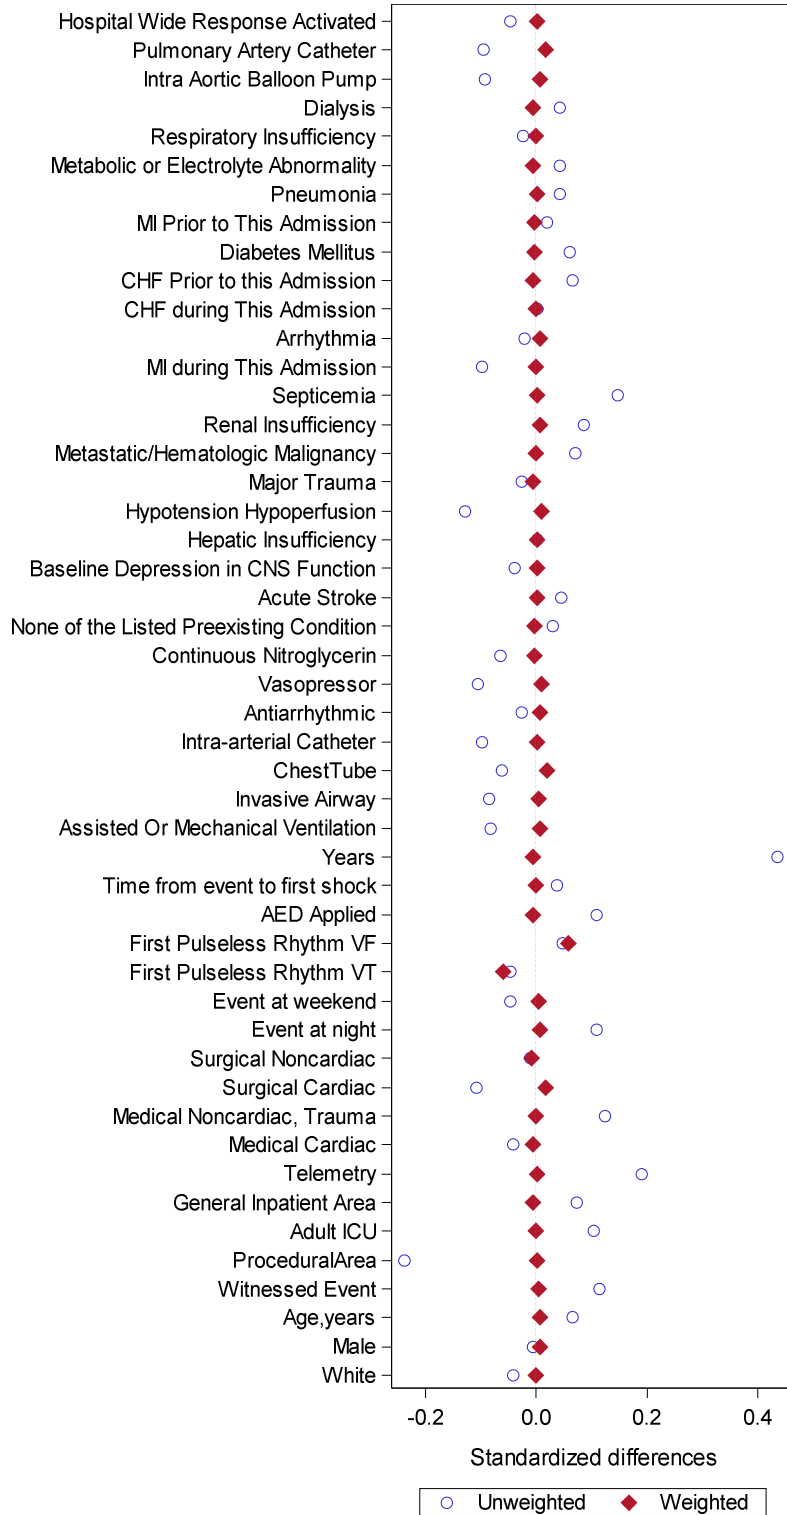

**Figure C. Temporal Trends in Defibrillation Intervals Categorized by Minute**

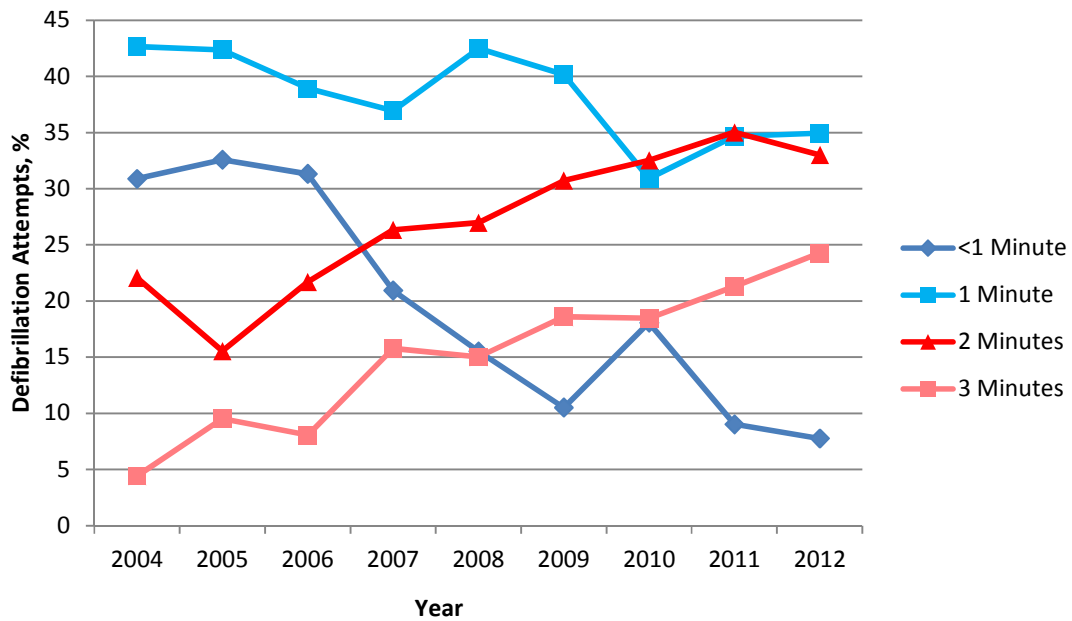

**Figure D. Proportion of Patients Excluded Over Time**

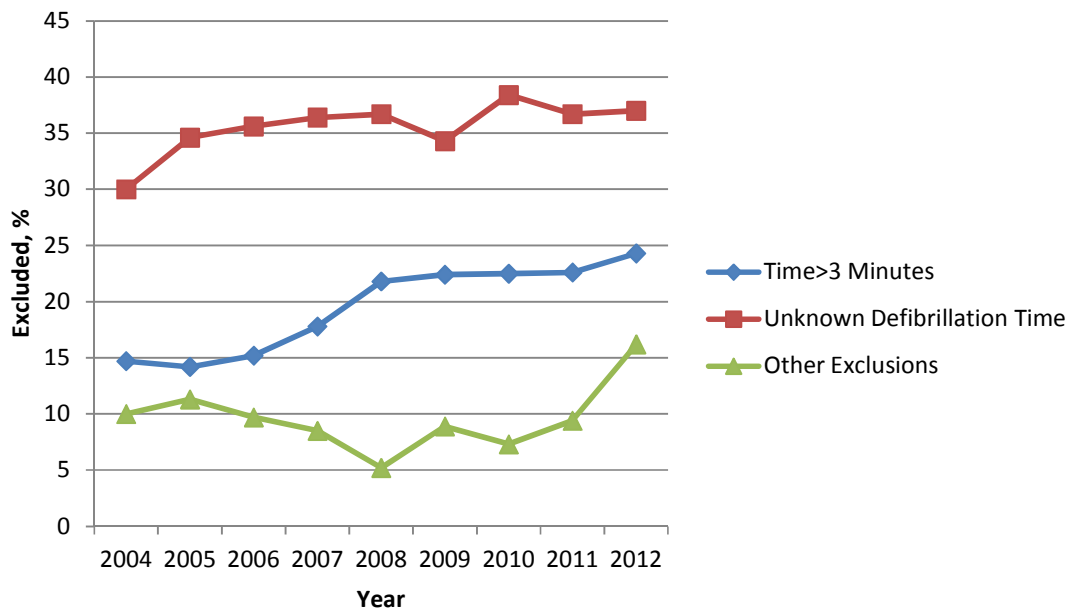

**Figure E. Adjusted Kaplan-Meier Curve**

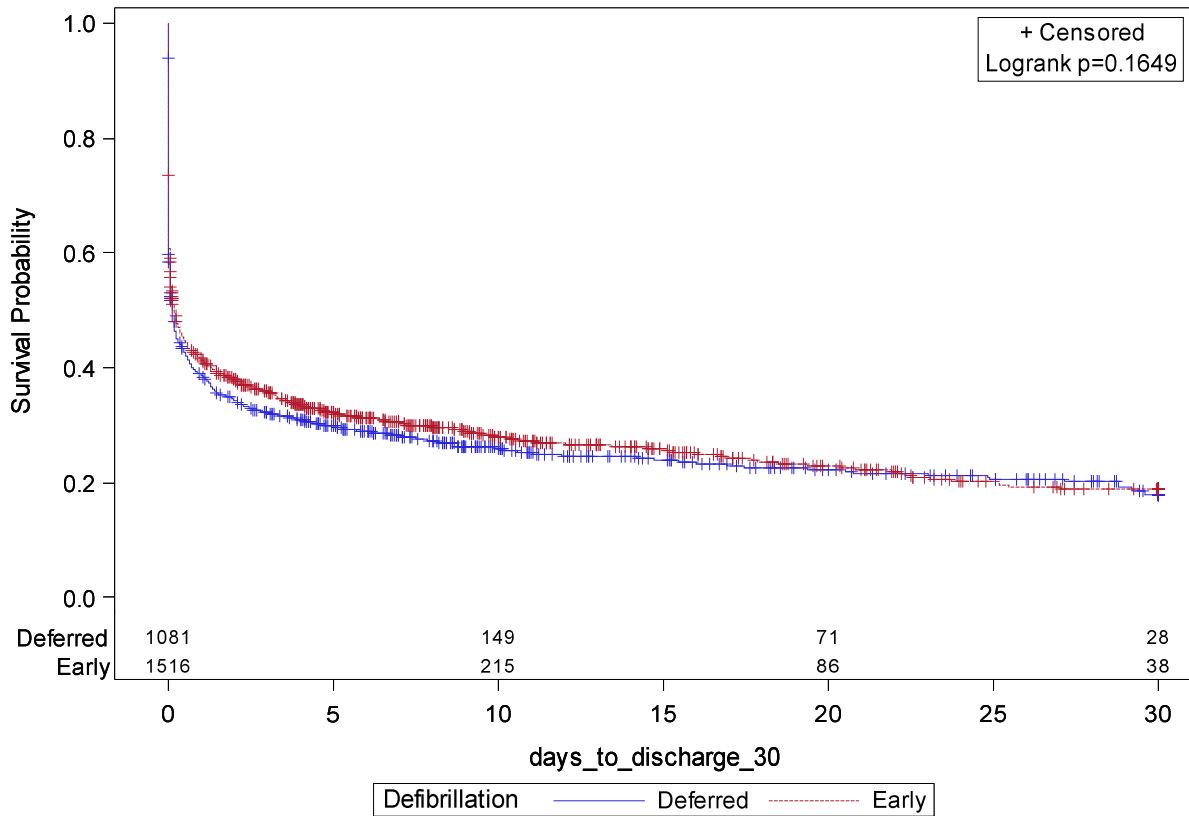

| Summary of the Number of Censored and Uncensored Values |                |       |        |          |                  |
|---------------------------------------------------------|----------------|-------|--------|----------|------------------|
| Stratum                                                 | Defibrillation | Total | Failed | Censored | Percent Censored |
| 1                                                       | Deferred       | 1087  | 820    | 267      | 24.56            |
| 2                                                       | Early          | 1526  | 1090   | 436      | 28.57            |
| Total                                                   |                | 2613  | 1910   | 703      | 26.9             |

**Table A.** Specification of covariates used in multivariate analyses

| <b>Variable</b>                                     | <b>Definition</b>                                                                                                                                                                                                                                                          | <b>Model specification</b> |
|-----------------------------------------------------|----------------------------------------------------------------------------------------------------------------------------------------------------------------------------------------------------------------------------------------------------------------------------|----------------------------|
| <u>Demographics</u>                                 |                                                                                                                                                                                                                                                                            |                            |
| Age                                                 | Age in years                                                                                                                                                                                                                                                               | Continuous (years)         |
| Race                                                | Self-reported                                                                                                                                                                                                                                                              | White, black, or other     |
| Sex                                                 | Self-reported                                                                                                                                                                                                                                                              | Male or female             |
| <u>Pre-existing disorders</u>                       |                                                                                                                                                                                                                                                                            |                            |
| Acute stroke                                        | Documented diagnosis of an intracranial or intraventricular hemorrhage or thrombosis during this admission                                                                                                                                                                 | Yes or no                  |
| Baseline depression in CNS                          | Evidence of a motor, cognitive, or functional baseline deficit (at time of system entry)                                                                                                                                                                                   | Yes or no                  |
| Hepatic insufficiency                               | Evidence of hepatic insufficiency within 24 hours up to the time of the event, defined by ANY of the following<br>1. Total bilirubin > 2 mg/dL and AST > 2x normal<br>2. Cirrhosis                                                                                         | Yes or no                  |
| Hypotension                                         | Evidence of hypotension within 4 hours up to the time of the event, defined by ANY of the following<br>1. SBP < 90 or MAP < 60 mmHg<br>2. Vasopressor or inotropic requirement after volume expansion (except for dopamine ≤ 3 mcg/kg/min)<br>3. Intra-aortic balloon pump | Yes or no                  |
| Major trauma                                        | Evidence of multi-system injury or single system injury associated with shock or altered mental status (during this hospitalization)                                                                                                                                       | Yes or no                  |
| Metastatic cancer                                   | Any solid tissue malignancy with evidence of metastasis, or any blood borne malignancy                                                                                                                                                                                     | Yes or no                  |
| Renal insufficiency                                 | Evidence of renal insufficiency prior to the event, defined by ANY of the following<br>1. Requiring ongoing dialysis or extra corporeal filtration therapies<br>2. Creatinine > 2 mg/dL within 24 hours up to the time of the event                                        | Yes or no                  |
| Septicemia                                          | Bloodstream infection where antibiotics have not yet been started or the infection is still being treated with antibiotics                                                                                                                                                 | Yes or no                  |
| Myocardial infarction this admission                | Documented diagnosis of myocardial ischemia (acute coronary syndrome) or myocardial infarction during this admission                                                                                                                                                       | Yes or no                  |
| None                                                | None of the above pre-existing conditions                                                                                                                                                                                                                                  | Yes or no                  |
| <u>Interventions in place at the time of arrest</u> |                                                                                                                                                                                                                                                                            |                            |

|                                      |                                                                                                                                                  |                                                                                                         |
|--------------------------------------|--------------------------------------------------------------------------------------------------------------------------------------------------|---------------------------------------------------------------------------------------------------------|
| Assisted or mechanical ventilation   | Including use of ventilation via invasive airway or non-invasive ventilation (CPAP or BiPAP)                                                     | Yes or no                                                                                               |
| Invasive airway device               | Use of an endotracheal tube or tracheostomy tube                                                                                                 | Yes or no                                                                                               |
| Chest tube                           | Use of a chest tube                                                                                                                              | Yes or no                                                                                               |
| Monitoring with an arterial line     | Use of an arterial line for continuous monitoring                                                                                                | Yes or no                                                                                               |
| Antiarrhythmic drugs                 | Use of amiodarone, lidocaine, procainamide, or other antiarrhythmic agents ongoing at the time of the event                                      | Yes or no                                                                                               |
| Vasopressor                          | Use of dobutamine, dopamine > 3 mcg/kg/min, epinephrine, norepinephrine, phenylephrine, other vasopressor agent ongoing at the time of the event | Yes or no                                                                                               |
| Vasodilators                         | Use of nitroglycerin ongoing at the time of the event                                                                                            | Yes or no                                                                                               |
| <u>Arrest characteristics</u>        |                                                                                                                                                  |                                                                                                         |
| Illness category                     | Category of illness at time of admission                                                                                                         | Medical-cardiac, medical-noncardiac, surgical-cardiac, surgical-noncardiac, obstetric, trauma, other    |
| Witnessed arrest                     | Cardiac arrest event was witnessed                                                                                                               | Yes or no                                                                                               |
| Event location                       | Location of patient in the hospital at the time of cardiac arrest                                                                                | ICU, monitored unit [telemetry], non-monitored unit, procedural area, other                             |
| Time of cardiac arrest               | Time of day when cardiac arrest occurred                                                                                                         | daytime (7:00 AM–10:59 PM)<br>night time (11:00 PM - 6:59 AM)<br>weekend (11:00 PM Fri. - 6:59 AM Mon.) |
| Time to first defibrillation attempt | Time to first defibrillation shock in minutes                                                                                                    | Continuous (minutes)                                                                                    |
| Time from admission to arrest        | Time from admission to cardiac arrest in days                                                                                                    | Continuous (days)                                                                                       |
| Calendar year                        | Year of cardiac arrest                                                                                                                           | Year                                                                                                    |
